# Supplementary material for: Water Vapor Exchange between Atmospheric Boundary Layer and Free Troposphere over Eastern China: Seasonal Characteristics and ENSO Anomaly
Source: Copernicus journal article supplement (doi:10.5194/egusphere-2023-1639), 2023-08-16
Supplement: Supplementary file 1 [file egusphere-2023-1639-supplement.pdf]

1 Table S1. Statistics of model performance of different parameterization schemes for the hourly  
 2 evolution of near-surface and vertical structure of specific humidity (Q), temperature (T), wind  
 3 speed (WS), as well as atmospheric boundary layer height (ABLH) and precipitation (Preci) at  
 4 Dezhou site (37.27°N, 116.72°E) during the winter sounding experiment (from December 26,  
 5 2017, to January 24, 2018).

|                            |          | WSM6+GD |       |      | Lin+GD |       |      | WSM6+KF |       |      | Lin+KF |       |      |
|----------------------------|----------|---------|-------|------|--------|-------|------|---------|-------|------|--------|-------|------|
|                            |          | R       | MB    | RMSE | R      | MB    | RMSE | R       | MB    | RMSE | R      | MB    | RMSE |
| Q<br>(g kg <sup>-1</sup> ) | surface  | 0.73    | -0.19 | 0.59 | 0.69   | -0.23 | 0.62 | 0.73    | -0.19 | 0.6  | 0.71   | -0.23 | 0.61 |
|                            | vertical | 0.61    | 0.04  | 0.43 | 0.58   | 0.03  | 0.43 | 0.59    | 0.03  | 0.43 | 0.58   | -0.04 | 0.44 |
| T<br>(K)                   | surface  | 0.9     | -1.45 | 2.7  | 0.89   | -1.61 | 2.85 | 0.89    | -1.44 | 2.73 | 0.88   | -2.81 | 3.56 |
|                            | vertical | 0.97    | -1.43 | 2.31 | 0.97   | -1.39 | 2.3  | 0.97    | -1.43 | 2.32 | 0.97   | -1.98 | 2.55 |
| WS<br>(m s <sup>-1</sup> ) | surface  | 0.55    | 2.14  | 2.71 | 0.56   | 2.14  | 2.68 | 0.55    | 2.14  | 2.71 | 0.51   | 1.97  | 2.56 |
|                            | vertical | 0.52    | 0.72  | 3.44 | 0.52   | 0.70  | 3.43 | 0.51    | 0.74  | 3.46 | 0.51   | 0.69  | 3.47 |
| ABLH (m)                   |          | 0.71    | -72   | 247  | 0.69   | -81   | 259  | 0.71    | -64   | 281  | 0.62   | -137  | 299  |
| Preci (mm/day)             |          | 0.99    | 0.01  | 0.05 | 0.68   | 0.05  | 0.16 | 0.89    | 0.01  | 0.06 | 0.78   | 0.03  | 0.12 |

6 Note. The temporal resolutions of sounding data and near-surface data are 3-hr and 1-hr,  
 7 respectively, except for daily accumulated precipitation.

8 Table S2. Statistics of model performance of different parameterization schemes for the hourly  
 9 evolution of near-surface and vertical structure of specific humidity (Q), temperature (T), wind  
 10 speed (WS), as well as atmospheric boundary layer height (ABLH) and precipitation (Preci) at  
 11 Dezhou site (37.27°N, 116.72°E) during the summer sounding experiment (from May 15 to  
 12 June 14, 2018).

|                            |          | WSM6+GD |       |      | Lin+GD |       |      | WSM6+KF |       |      | Lin+KF |       |      |
|----------------------------|----------|---------|-------|------|--------|-------|------|---------|-------|------|--------|-------|------|
|                            |          | R       | MB    | RMSE | R      | MB    | RMSE | R       | MB    | RMSE | R      | MB    | RMSE |
| Q<br>(g kg <sup>-1</sup> ) | surface  | 0.81    | -2.05 | 3.05 | 0.79   | -2.16 | 3.22 | 0.81    | -2.02 | 3.06 | 0.8    | -2.13 | 3.16 |
|                            | vertical | 0.69    | -0.29 | 2.18 | 0.67   | -0.34 | 2.2  | 0.68    | -0.32 | 2.18 | 0.67   | -0.31 | 2.19 |
| T<br>(K)                   | surface  | 0.87    | 1.50  | 3.11 | 0.86   | 1.61  | 3.21 | 0.85    | 1.54  | 3.17 | 0.85   | 1.55  | 3.19 |
|                            | vertical | 0.95    | 1.89  | 2.83 | 0.91   | 1.94  | 3.23 | 0.93    | 2.21  | 3.15 | 0.91   | 2.29  | 3.56 |
| WS<br>(m s <sup>-1</sup> ) | surface  | 0.58    | 2.44  | 2.97 | 0.56   | 2.48  | 2.93 | 0.56    | 2.51  | 3.01 | 0.52   | 2.59  | 3.11 |
|                            | vertical | 0.54    | 1.10  | 3.21 | 0.53   | 1.16  | 3.34 | 0.52    | 1.10  | 3.4  | 0.5    | 1.21  | 3.57 |
| ABLH (m)                   |          | 0.84    | 121   | 343  | 0.79   | 146   | 379  | 0.82    | 132   | 379  | 0.8    | 139   | 387  |
| Preci (mm/day)             |          | 0.91    | -0.59 | 2.79 | 0.83   | -0.93 | 3.77 | 0.87    | -0.76 | 3.11 | 0.85   | -0.88 | 3.35 |

13 Note. The temporal resolutions of sounding data and near-surface data are 3-hr and 1-hr,  
 14 respectively, except for daily accumulated precipitation.

15 Table S3. Statistics of mean, standard deviation, and Kolmogorov-Smirnov test significance for  
 16 the key meteorological elements at near-surface and 700 hPa over 30 years of historical data  
 17 (1990-2019) and 7 years of the sampling period (2011&2014-2019).

| Variables       | 30-year<br>mean±adv     | 7-year<br>mean±adv | K-S Sig.<br>(p<0.05) |       |
|-----------------|-------------------------|--------------------|----------------------|-------|
| ABLH (m)        | 469.7±91.9              | 470.3±90.1         | 1.000                |       |
| Preci (mm)      | 3.55±2.01               | 3.36±1.83          | 0.938                |       |
| Near<br>surface | U (m s <sup>-1</sup> )  | -0.29±0.28         | -0.30±0.28           | 0.890 |
|                 | V (m s <sup>-1</sup> )  | -0.07±0.66         | -0.10±0.65           | 0.999 |
|                 | T (K)                   | 287.8±8.2          | 288.0±8.2            | 0.983 |
| 700hPa          | U (m s <sup>-1</sup> )  | 4.84±2.05          | 4.72±2.01            | 0.991 |
|                 | V (m s <sup>-1</sup> )  | 0.60±1.28          | 0.59±1.13            | 0.882 |
|                 | W (Pa s <sup>-1</sup> ) | -0.006±0.019       | -0.005±0.017         | 0.993 |
|                 | Q (g kg <sup>-1</sup> ) | 4.79±2.06          | 4.87±2.14            | 0.986 |
|                 | T (K)                   | 276.6±5.6          | 276.8±5.7            | 0.995 |

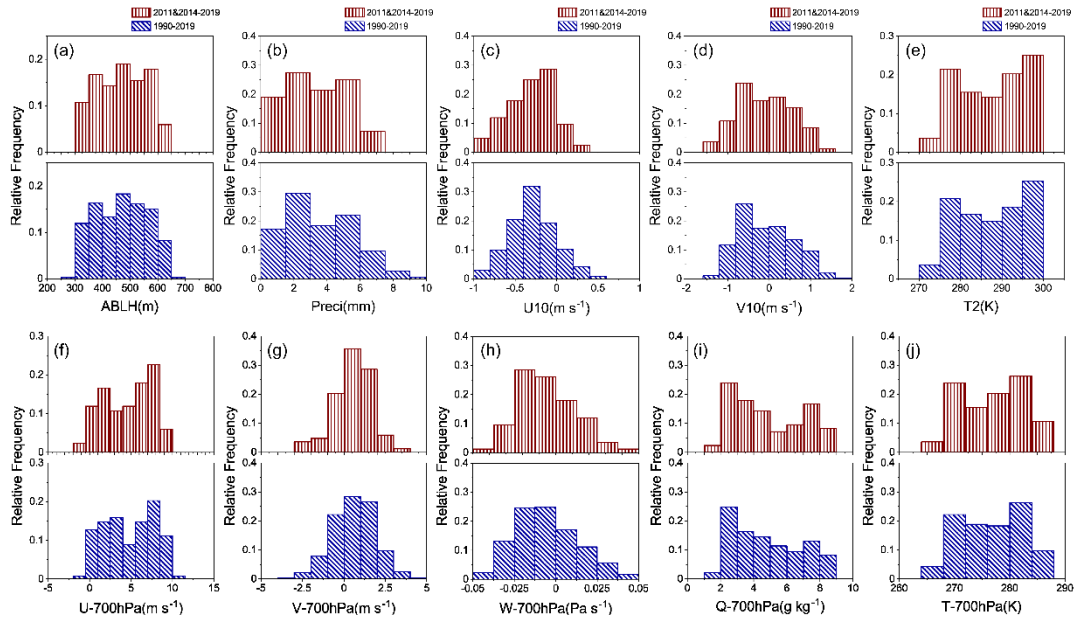

18

19 Figure S1. Histogram of the (a) boundary layer height, (b) precipitation, (c-d) 10 m horizontal  
 20 winds, (e) 2 m temperature, as well as (f-h) three-dimension wind component, (i) specific  
 21 humidity, (j) temperature at 700 hPa during 7-year sample (2011&2014-2019, filled with brown  
 22 vertical lines) and 30-year climatology (1990-2019, filled with blue oblique lines).

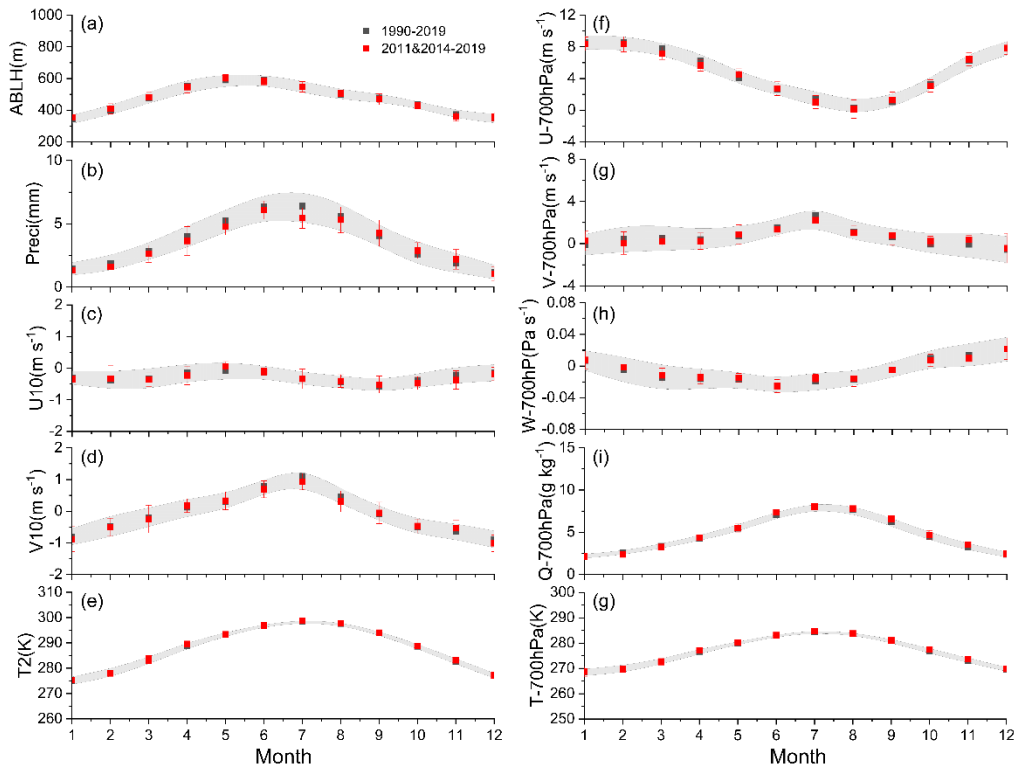

23

24 Figure S2. Annual variation of the monthly average with standard deviation for (a) boundary  
 25 layer height, (b) precipitation, (c-d) 10 m horizontal winds, (e) 2 m temperature, as well as (f-  
 26 h) three-dimension wind component, (i) specific humidity, (j) temperature at 700 hPa during 7-  
 27 year sample (2011&2014-2019, red square with line) and 30-year climatology (1990-2019,  
 28 black square with gray-shaded area).

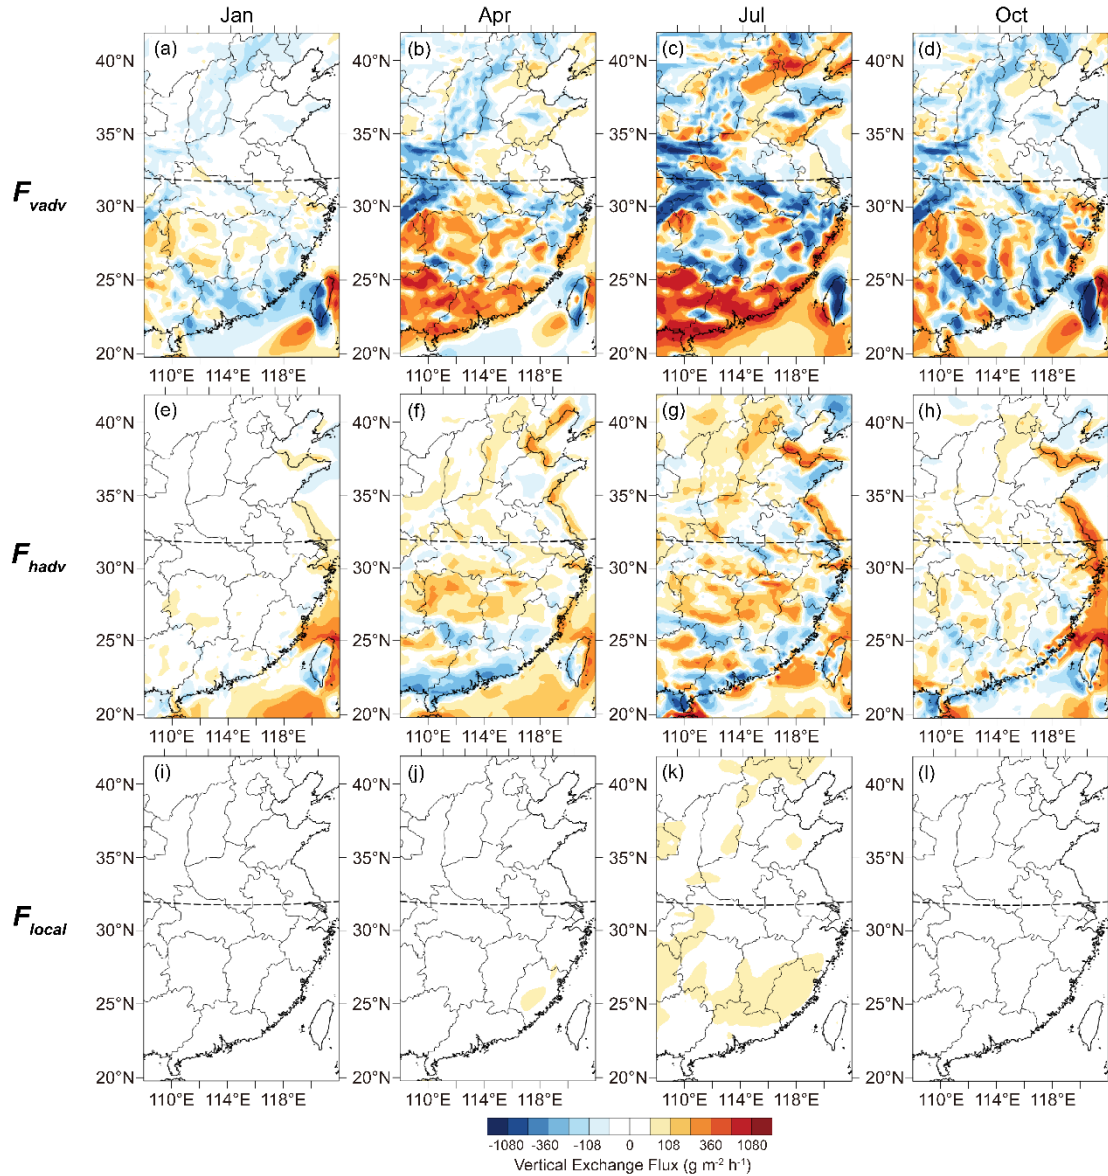

29 Figure S3. Spatial distribution of three average flux components of ABL-FT water vapor  
 30 exchange ( $F_{vadv}$ , a-d;  $F_{hadv}$ , e-h;  $F_{local}$ , i-l) averaged over 7-year for January, April, July, and  
 31 October. Positive and negative fluxes (warm and cool colors) represent water vapor upward and  
 32 downward transport at the ABL and FT interface. Black dashed lines mark the boundary  
 33 between the northern (32-42°N, 108-122°E) and southern (20-32°N, 108-122°E) regions.

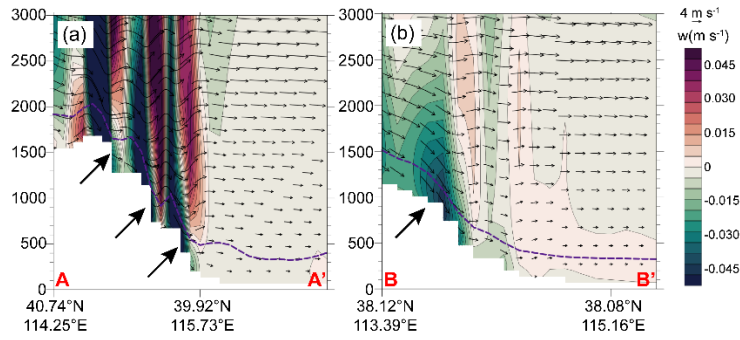

34

35 Figure S4. The height cross-sections of vertical velocity superimposed with u-w wind vectors  
 36 (w multiplied by 100) averaged over 7-year for January. Cross sections extracted from (AA':  
 37 41.21°N, 115.15°E) to (39.09°N, 117.20°E) and from (BB': 38.1°N, 113.45°E) to (38.1°N,  
 38 115.47°E), respectively. The thin arrows, purple dashed lines and bold arrows indicate u-w wind  
 39 vectors, ABL heights and steep/gentle slopes, respectively.

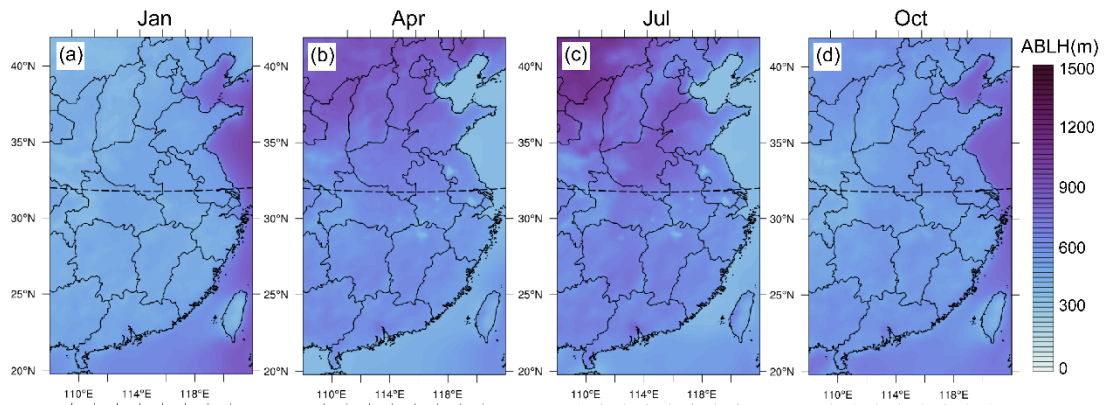

40

41 Figure S5. Spatial distribution of ABL height averaged over 7-year for (a) January, (b) April,  
 42 (c) July, and (d) October. Black dashed lines mark the boundary between the northern (32-42°N,  
 43 108-122°E) and southern (20-32°N, 108-122°E) regions.

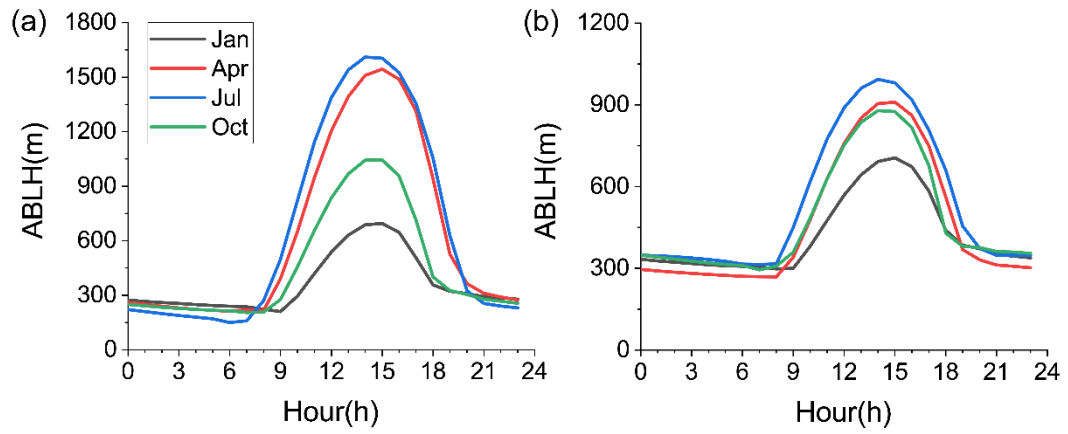

44 Figure S6. Daily cycle of ABL height over the (a) northern (32-42°N, 108-122°E) and  
 45 southern (20-32°N, 108-122°E) regions averaged over 7-year for January, April, July, and  
 46 October.
